# Supplementary material for: A novel Ce3+activated Lu3MgAl3SiO12garnet phosphor for blue chip light-emitting diodes with excellent performance
Source: Royal Society of Chemistry journal article supplement (doi:10.1039/c4dt03144j), 2014-11-24
Supplement: c4dt03144j1.pdf [file c4dt03144j1.pdf]

Supporting Information

# Novel $\text{Ce}^{3+}$ activated $\text{Lu}_3\text{MgAl}_3\text{SiO}_{12}$ garnet phosphor for blue chip light-emitting diodes with excellent performance

Yurong Shi,<sup>a,b</sup> Ge Zhu,<sup>a</sup> Masayoshi Mikami,<sup>c</sup> Yasuo Shimomura<sup>c</sup> and Yuhua Wang<sup>\*a</sup>

Received (in XXX, XXX) Xth XXXXXXXXX 20XX, Accepted Xth XXXXXXXXX 20XX

DOI: 10.1039/b000000x

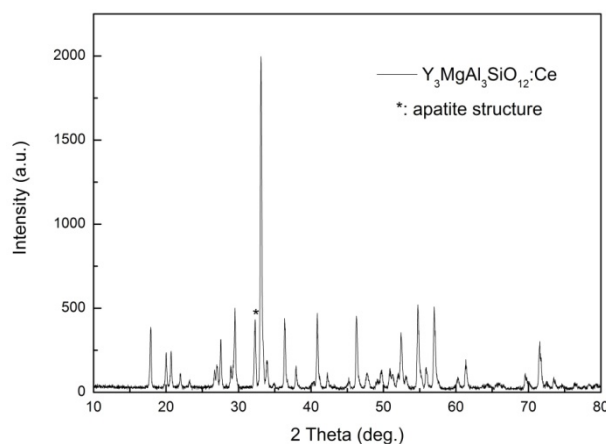

Figure S1 XRD pattern of synthesized  $\text{Y}_3\text{MgAl}_3\text{SiO}_{12}:\text{Ce}$  phosphor.

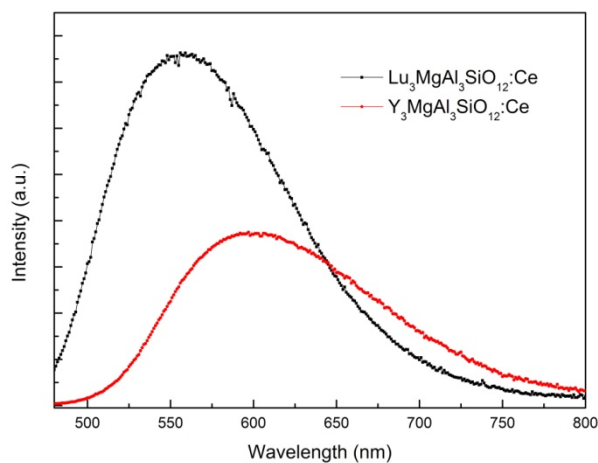

Figure S2 PL spectra of  $\text{Lu}_3\text{MgAl}_3\text{SiO}_{12}:\text{Ce}$  and  $\text{Y}_3\text{MgAl}_3\text{SiO}_{12}:\text{Ce}$  phosphors.

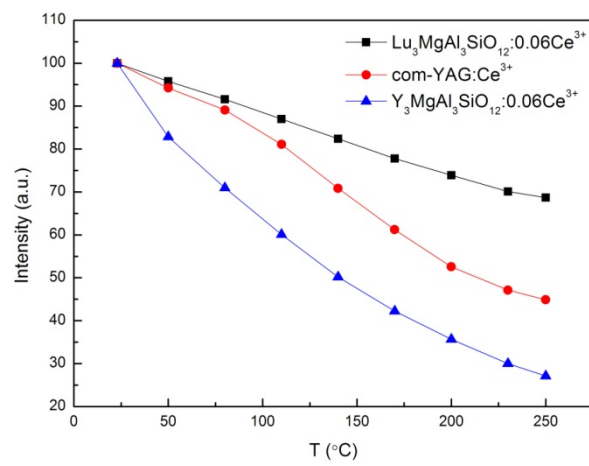

Figure S3 The brightness vs temperature for  $\text{Lu}_3\text{MgAl}_3\text{SiO}_{12}:\text{Ce}$ ,  $\text{Y}_3\text{MgAl}_3\text{SiO}_{12}:\text{Ce}$  and com-YAG:Ce phosphors.
